# Supplementary material
Source: PubMed Central journal article supplement (PMC3607078)
Supplement: NIHMS442679-supplement-supplement_1.pdf [file NIHMS442679-supplement-supplement_1.pdf]

1 **Table 1. Molecular lipid species composition following CUR**  
2 **treatment.** The values shown are relative abundance of lipid species as  
3 mole percentage of the normalized total mass spectral signal of the  
4 particular lipid group. The total for each lipid class was calculated by  
5 adding the mole percentage of the molecular lipid species of that class.  
6 Values are means  $\pm$  SD (n = 3).

| Lipid Species       | No CUR                          | CUR                             | Lipid Species   | No CUR                           | CUR                              | Lipid Species   | No CUR                           | CUR                              |
|---------------------|---------------------------------|---------------------------------|-----------------|----------------------------------|----------------------------------|-----------------|----------------------------------|----------------------------------|
| PG 30:1             | 0 $\pm$ 0                       | 0 $\pm$ 0                       | PE 35:0         | 0 $\pm$ 0                        | 0 $\pm$ 0                        | PI 34:3         | 0.5 $\pm$ 0                      | 0.3 $\pm$ 0.4                    |
| PG 30:0             | 0 $\pm$ 0                       | 0 $\pm$ 0                       | PE 36:6         | 0.1 $\pm$ 0                      | 0 $\pm$ 0                        | PI 34:2         | 5 $\pm$ 0.2                      | 4.4 $\pm$ 3.5                    |
| PG 32:2             | 0 $\pm$ 0                       | 0 $\pm$ 0                       | PE 36:5         | 1.6 $\pm$ 0.1                    | 0.8 $\pm$ 0.4                    | PI 34:1         | 5 $\pm$ 0.4                      | 4.3 $\pm$ 3.1                    |
| PG 32:1             | 0.1 $\pm$ 0                     | 0.2 $\pm$ 0.2                   | PE 36:4         | 4.3 $\pm$ 0.4                    | 2.5 $\pm$ 0.7                    | PI 35:2         | 0.4 $\pm$ 0                      | 0.1 $\pm$ 0.1                    |
| PG 32:0             | 0 $\pm$ 0                       | 0 $\pm$ 0                       | PE 36:3         | 4.4 $\pm$ 0.4                    | 3.2 $\pm$ 0.7                    | PI 35:1         | 0.3 $\pm$ 0                      | 0 $\pm$ 0                        |
| PG 34:4             | 0 $\pm$ 0                       | 0 $\pm$ 0                       | PE 36:2         | 3.3 $\pm$ 0.2                    | 2.6 $\pm$ 0.4                    | PI 35:0         | 0 $\pm$ 0                        | 0 $\pm$ 0                        |
| PG 34:3             | 0 $\pm$ 0                       | 0 $\pm$ 0.1                     | PE 36:1         | 0.6 $\pm$ 0.1                    | 0.6 $\pm$ 0.3                    | PI 36:6         | 0 $\pm$ 0                        | 0.1 $\pm$ 0.1                    |
| PG 34:2             | 0.6 $\pm$ 0.1                   | 1 $\pm$ 0.3                     | PE 36:0         | 0 $\pm$ 0                        | 0 $\pm$ 0                        | PI 36:5         | 0.1 $\pm$ 0                      | 0 $\pm$ 0                        |
| PG 34:1             | 0.6 $\pm$ 0                     | 1.4 $\pm$ 0.5                   | PE 37:2         | 0 $\pm$ 0                        | 0 $\pm$ 0                        | PI 36:4         | 0.4 $\pm$ 0                      | 0.1 $\pm$ 0.1                    |
| PG 34:0             | 0 $\pm$ 0                       | 0 $\pm$ 0                       | PE 37:1         | 0 $\pm$ 0                        | 0 $\pm$ 0                        | PI 36:3         | 0.8 $\pm$ 0                      | 0.9 $\pm$ 0.6                    |
| PG 34:5-O           | 0 $\pm$ 0                       | 0 $\pm$ 0                       | PE 37:0         | 0 $\pm$ 0                        | 0 $\pm$ 0                        | PI 36:2         | 1.2 $\pm$ 0.1                    | 0.6 $\pm$ 0.8                    |
| PG 34:4-O           | 0 $\pm$ 0                       | 0 $\pm$ 0                       | PE 38:6         | 0 $\pm$ 0                        | 0 $\pm$ 0                        | PI 36:1         | 0.7 $\pm$ 0.1                    | 0.1 $\pm$ 0.2                    |
| PG 36:6             | 0 $\pm$ 0                       | 0 $\pm$ 0                       | PE 38:5         | 0 $\pm$ 0                        | 0 $\pm$ 0                        | PI 38:2         | 0 $\pm$ 0                        | 0 $\pm$ 0                        |
| PG 36:5             | 0 $\pm$ 0                       | 0 $\pm$ 0                       | PE 38:4         | 0 $\pm$ 0                        | 0 $\pm$ 0                        | PI 38:1         | 0 $\pm$ 0                        | 0 $\pm$ 0                        |
| PG 36:4             | 0 $\pm$ 0                       | 0 $\pm$ 0                       | PE 38:3         | 0 $\pm$ 0                        | 0 $\pm$ 0                        | PI 38:0         | 0 $\pm$ 0                        | 0 $\pm$ 0                        |
| PG 36:3             | 0 $\pm$ 0                       | 0 $\pm$ 0                       | PE 38:2         | 0 $\pm$ 0                        | 0 $\pm$ 0                        | <b>Total PI</b> | <b>15.5 <math>\pm</math> 0.9</b> | <b>11.5 <math>\pm</math> 8.7</b> |
| PG 36:2             | 0 $\pm$ 0                       | 0 $\pm$ 0                       | PE 38:1         | 0 $\pm$ 0                        | 0 $\pm$ 0                        | PS 30:2         | 0 $\pm$ 0                        | 0 $\pm$ 0                        |
| PG 36:1             | 0 $\pm$ 0                       | 0 $\pm$ 0                       | PE 38:0         | 0 $\pm$ 0                        | 0 $\pm$ 0                        | PS 30:1         | 0 $\pm$ 0                        | 0 $\pm$ 0                        |
| PG 38:6             | 0 $\pm$ 0                       | 0 $\pm$ 0                       | PE 40:3         | 0 $\pm$ 0                        | 0 $\pm$ 0                        | PS 30:0         | 0 $\pm$ 0                        | 0 $\pm$ 0                        |
| PG 38:5             | 0 $\pm$ 0                       | 0 $\pm$ 0                       | PE 40:2         | 0 $\pm$ 0                        | 0 $\pm$ 0                        | PS 32:2         | 0 $\pm$ 0                        | 0 $\pm$ 0                        |
| <b>Total PG</b>     | <b>1.5 <math>\pm</math> 0.1</b> | <b>2.8 <math>\pm</math> 0.9</b> | PE 42:4         | 0 $\pm$ 0                        | 0 $\pm$ 0                        | PS 32:1         | 0.3 $\pm$ 0                      | 0.3 $\pm$ 0.3                    |
| LysoPG 16:1         | 0 $\pm$ 0                       | 0 $\pm$ 0                       | PE 42:3         | 0 $\pm$ 0                        | 0 $\pm$ 0                        | PS 32:0         | 0 $\pm$ 0                        | 0 $\pm$ 0                        |
| LysoPG 16:0         | 0 $\pm$ 0                       | 0.1 $\pm$ 0.1                   | PE 42:2         | 0 $\pm$ 0                        | 0 $\pm$ 0                        | PS 33:2         | 0 $\pm$ 0                        | 0 $\pm$ 0                        |
| LysoPG 18:3         | 0 $\pm$ 0                       | 0 $\pm$ 0.1                     | <b>Total PE</b> | <b>27.2 <math>\pm</math> 1.8</b> | <b>22.3 <math>\pm</math> 4.7</b> | PS 33:1         | 0.1 $\pm$ 0                      | 0.1 $\pm$ 0.1                    |
| LysoPG 18:2         | 0 $\pm$ 0                       | 0 $\pm$ 0                       | PC 26:1         | 0 $\pm$ 0                        | 0 $\pm$ 0                        | PS 33:0         | 0 $\pm$ 0                        | 0 $\pm$ 0                        |
| LysoPG 18:1         | 0 $\pm$ 0                       | 0 $\pm$ 0                       | PC 26:0         | 0 $\pm$ 0                        | 0 $\pm$ 0                        | PS 34:4         | 0 $\pm$ 0                        | 0 $\pm$ 0                        |
| <b>Total lysoPG</b> | <b>0 <math>\pm</math> 0</b>     | <b>0.1 <math>\pm</math> 0.1</b> | PC 28:1         | 0 $\pm$ 0                        | 0.1 $\pm$ 0.1                    | PS 34:3         | 0.1 $\pm$ 0                      | 0.1 $\pm$ 0.1                    |
| LysoPC 14:1         | 0 $\pm$ 0                       | 0 $\pm$ 0                       | PC 28:0         | 0 $\pm$ 0                        | 0 $\pm$ 0                        | PS 34:2         | 1.8 $\pm$ 0.1                    | 1.8 $\pm$ 2.4                    |
| LysoPC 14:0         | 0 $\pm$ 0                       | 0 $\pm$ 0                       | PC 30:2         | 0 $\pm$ 0                        | 0 $\pm$ 0                        | PS 34:1         | 2.8 $\pm$ 0.1                    | 2.2 $\pm$ 3.9                    |
| LysoPC 15:1         | 0 $\pm$ 0                       | 0 $\pm$ 0                       | PC 30:1         | 0 $\pm$ 0                        | 0.1 $\pm$ 0                      | PS 34:0         | 0 $\pm$ 0                        | 0 $\pm$ 0                        |
| LysoPC 15:0         | 0 $\pm$ 0                       | 0 $\pm$ 0                       | PC 30:0         | 0 $\pm$ 0                        | 0 $\pm$ 0                        | PS 35:2         | 0.1 $\pm$ 0                      | 0.1 $\pm$ 0.1                    |
| LysoPC 16:1         | 0.2 $\pm$ 0                     | 0.3 $\pm$ 0.1                   | PC 31:2         | 0 $\pm$ 0                        | 0 $\pm$ 0                        | PS 35:1         | 0.1 $\pm$ 0                      | 0.1 $\pm$ 0.3                    |
| LysoPC 16:0         | 0.1 $\pm$ 0                     | 0.1 $\pm$ 0                     | PC 31:1         | 0 $\pm$ 0                        | 0 $\pm$ 0                        | PS 35:0         | 0 $\pm$ 0                        | 0 $\pm$ 0                        |
| LysoPC 17:1         | 0 $\pm$ 0                       | 0 $\pm$ 0                       | PC 31:0         | 0 $\pm$ 0                        | 0 $\pm$ 0                        | PS 36:6         | 0 $\pm$ 0                        | 0 $\pm$ 0                        |
| LysoPC 17:0         | 0 $\pm$ 0                       | 0 $\pm$ 0                       | PC 32:2         | 1.3 $\pm$ 0                      | 2.1 $\pm$ 0.4                    | PS 36:5         | 0 $\pm$ 0                        | 0 $\pm$ 0                        |
| LysoPC 18:3         | 0.1 $\pm$ 0                     | 0 $\pm$ 0                       | PC 32:1         | 0.8 $\pm$ 0.1                    | 1.2 $\pm$ 0.3                    | PS 36:4         | 0.1 $\pm$ 0                      | 0 $\pm$ 0                        |
| LysoPC 18:2         | 0.5 $\pm$ 0.2                   | 0.9 $\pm$ 0.5                   | PC 32:0         | 0 $\pm$ 0                        | 0.3 $\pm$ 0                      | PS 36:3         | 0.1 $\pm$ 0                      | 0 $\pm$ 0                        |
| LysoPC 18:1         | 0.4 $\pm$ 0.1                   | 0.9 $\pm$ 0.4                   | PC 33:2         | 0.5 $\pm$ 0                      | 0.3 $\pm$ 0.1                    | PS 36:2         | 0.3 $\pm$ 0                      | 0.3 $\pm$ 0.4                    |
| LysoPC 18:0         | 0 $\pm$ 0                       | 0 $\pm$ 0                       | PC 33:1         | 0.2 $\pm$ 0                      | 0.2 $\pm$ 0                      | PS 36:1         | 0.2 $\pm$ 0                      | 0.1 $\pm$ 0.1                    |
| <b>Total LysoPC</b> | <b>1.4 <math>\pm</math> 0.4</b> | <b>2.3 <math>\pm</math> 1.1</b> | PC 33:0         | 0 $\pm$ 0                        | 0 $\pm$ 0                        | PS 36:0         | 0 $\pm$ 0                        | 0 $\pm$ 0                        |
| LysoPE 14:1         | 0 $\pm$ 0                       | 0 $\pm$ 0                       | PC 34:4         | 1.1 $\pm$ 0.1                    | 0.9 $\pm$ 0.2                    | PS 38:6         | 0 $\pm$ 0                        | 0 $\pm$ 0                        |
| LysoPE 15:1         | 0 $\pm$ 0                       | 0 $\pm$ 0                       | PC 34:3         | 6.6 $\pm$ 0.2                    | 6.1 $\pm$ 1                      | PS 38:5         | 0 $\pm$ 0                        | 0 $\pm$ 0                        |
| LysoPE 15:0         | 0 $\pm$ 0                       | 0 $\pm$ 0                       | PC 34:2         | 5.5 $\pm$ 0.5                    | 6.7 $\pm$ 1                      | PS 38:4         | 0 $\pm$ 0                        | 0 $\pm$ 0                        |
| LysoPE 16:1         | 0.1 $\pm$ 0                     | 0 $\pm$ 0                       | PC 34:1         | 2 $\pm$ 0.1                      | 2.1 $\pm$ 0.4                    | PS 38:3         | 0 $\pm$ 0                        | 0 $\pm$ 0                        |
| LysoPE 16:0         | 0.2 $\pm$ 0                     | 0.3 $\pm$ 0.2                   | PC 36:6         | 0.1 $\pm$ 0                      | 0.1 $\pm$ 0.1                    | PS 38:2         | 0 $\pm$ 0                        | 0 $\pm$ 0                        |
| LysoPE 17:1         | 0 $\pm$ 0                       | 0 $\pm$ 0                       | PC 36:5         | 2.1 $\pm$ 0.2                    | 1.9 $\pm$ 0.5                    | PS 38:1         | 0 $\pm$ 0                        | 0 $\pm$ 0                        |
| LysoPE 17:0         | 0 $\pm$ 0                       | 0 $\pm$ 0                       | PC 36:4         | 7.4 $\pm$ 0.3                    | 9.5 $\pm$ 1.2                    | PS 40:4         | 0 $\pm$ 0                        | 0 $\pm$ 0                        |
| LysoPE 18:3         | 0.1 $\pm$ 0                     | 0 $\pm$ 0                       | PC 36:3         | 8.6 $\pm$ 0.4                    | 11.3 $\pm$ 2.5                   | PS 40:3         | 0 $\pm$ 0                        | 0 $\pm$ 0                        |

|                             |                |                   |                    |                                    |                   |                   |                    |                  |  |
|-----------------------------|----------------|-------------------|--------------------|------------------------------------|-------------------|-------------------|--------------------|------------------|--|
| LysoPE 18:2                 | 0.3 ± 0        | 0.3 ± 0.1         | PC 36:2            | 4.2 ± 0.2                          | 5 ± 0.9           | PS 40:2           | 0 ± 0              | 0 ± 0            |  |
| LysoPE 18:1                 | 0.3 ± 0        | 0.3 ± 0.3         | PC 36:1            | 0.8 ± 0                            | 1.4 ± 0.2         | PS 40:1           | 0 ± 0              | 0 ± 0            |  |
| LysoPE 20:1                 | 0 ± 0          | 0 ± 0             | PC 38:6            | 0 ± 0                              | 0 ± 0             | PS 42:4           | 0 ± 0              | 0 ± 0            |  |
| LysoPE 20:0                 | 0 ± 0          | 0 ± 0             | PC 38:5            | 0.1 ± 0                            | 0 ± 0             | PS 42:3           | 0 ± 0              | 0 ± 0            |  |
| Total LysoPE                | <b>1 ± 0.1</b> | <b>0.9 ± 0.6</b>  | PC 38:4            | 0.1 ± 0                            | 0.1 ± 0           | PS 42:2           | 0 ± 0              | 0 ± 0            |  |
| PE 26:1                     | 0 ± 0          | 0 ± 0             | PC 38:3            | 0.2 ± 0                            | 0.3 ± 0.1         | PS 42:1           | 0 ± 0              | 0 ± 0            |  |
| PE 26:0                     | 0 ± 0          | 0 ± 0             | PC 38:2            | 0.1 ± 0                            | 0.2 ± 0           | PS 44:3           | 0 ± 0              | 0 ± 0            |  |
| PE 28:1                     | 0 ± 0          | 0 ± 0             | PC 40:5            | 0 ± 0                              | 0 ± 0             | PS 44:2           | 0 ± 0              | 0 ± 0            |  |
| PE 30:2                     | 0 ± 0          | 0 ± 0             | PC 40:4            | 0 ± 0                              | 0 ± 0             | TOTAL PS          | <b>6.2 ± 0.2</b>   | <b>5.1 ± 7.8</b> |  |
| PE 30:1                     | 0 ± 0          | 0 ± 0             | PC 40:3            | 0 ± 0                              | 0.2 ± 0.1         | PA 32:2           | 0.1 ± 0            | 0.1 ± 0.1        |  |
| PE 30:0                     | 0 ± 0          | 0 ± 0             | PC 40:2            | 0 ± 0                              | 0.1 ± 0.1         | PA 32:1           | 0.1 ± 0            | 0 ± 0.1          |  |
| PE 31:2                     | 0 ± 0          | 0 ± 0             | Total PC           | <b>41.9 ± 1.2</b>                  | <b>50.5 ± 6.5</b> | PA 32:0           | 0 ± 0              | 0 ± 0            |  |
| PE 31:1                     | 0 ± 0          | 0 ± 0             | PI 26:0            | 0 ± 0                              | 0 ± 0             | PA 34:6           | 0 ± 0              | 0 ± 0            |  |
| PE 31:0                     | 0 ± 0          | 0 ± 0             | PI 28:0            | 0 ± 0                              | 0 ± 0             | PA 34:5           | 0 ± 0              | 0 ± 0            |  |
| PE 32:2                     | 0.4 ± 0        | 0.5 ± 0.1         | PI 30:2            | 0 ± 0                              | 0 ± 0             | PA 34:4           | 0.1 ± 0            | 0 ± 0            |  |
| PE 32:1                     | 0.5 ± 0        | 0.8 ± 0.2         | PI 30:1            | 0 ± 0                              | 0 ± 0             | PA 34:3           | 0.5 ± 0            | 0.3 ± 0.3        |  |
| PE 32:0                     | 0 ± 0          | 0 ± 0             | PI 30:0            | 0 ± 0                              | 0 ± 0             | PA 34:2           | 1.3 ± 0.1          | 1.7 ± 1          |  |
| PE 33:2                     | 0.2 ± 0        | 0.1 ± 0.1         | PI 31:2            | 0 ± 0                              | 0 ± 0             | PA 34:1           | 1 ± 0              | 1 ± 0.7          |  |
| PE 33:1                     | 0.1 ± 0        | 0.1 ± 0.1         | PI 31:1            | 0 ± 0                              | 0 ± 0             | PA 36:6           | 0 ± 0              | 0 ± 0            |  |
| PE 33:0                     | 0 ± 0          | 0 ± 0             | PI 31:0            | 0 ± 0                              | 0 ± 0             | PA 36:5           | 0.1 ± 0            | 0 ± 0.1          |  |
| PE 34:4                     | 0.6 ± 0        | 0.2 ± 0.2         | PI 32:2            | 0.1 ± 0                            | 0.1 ± 0.1         | PA 36:4           | 0.5 ± 0.1          | 0.3 ± 0.1        |  |
| PE 34:3                     | 2 ± 0.2        | 1.3 ± 0.3         | PI 32:1            | 0.5 ± 0                            | 0.5 ± 0.4         | PA 36:3           | 0.7 ± 0.1          | 0.5 ± 0.4        |  |
| PE 34:2                     | 5.4 ± 0.3      | 5.3 ± 1           | PI 32:0            | 0 ± 0                              | 0 ± 0             | PA 36:2           | 0.7 ± 0.1          | 0.5 ± 0.3        |  |
| PE 34:1                     | 2.7 ± 0.1      | 4 ± 0.6           | PI 33:2            | 0.2 ± 0                            | 0 ± 0             | PA 36:1           | 0.1 ± 0            | 0 ± 0            |  |
| PE 34:0                     | 0 ± 0          | 0 ± 0             | PI 33:1            | 0.3 ± 0                            | 0 ± 0             | Total PA          | <b>5.2 ± 0.4</b>   | <b>4.4 ± 2.3</b> |  |
| PE 35:2                     | 0.4 ± 0        | 0.2 ± 0.1         | PI 33:0            | 0 ± 0                              | 0 ± 0             | Total PGL         | <b>100</b>         | <b>100</b>       |  |
| PE 35:1                     | 0.1 ± 0        | 0 ± 0             | PI 34:4            | 0 ± 0                              | 0 ± 0             |                   |                    |                  |  |
| Lipid Species               | Fatty acyl     | No CUR            | CUR                | Lipid Species                      | Fatty acyl        | No CUR            | CUR                |                  |  |
| CER 44:0;3                  |                | 47.2 ± 2.2        | 7.9 ± 10.3         | Zymosterol                         | 18:3              | 0.2 ± 0           | 0.4 ± 0.8          |                  |  |
| CER 46:0;3                  |                | 0.3 ± 0           | 0.6 ± 0.6          | Ergostatetraenol                   | 18:3              | 0.5 ± 0.1         | 0 ± 0              |                  |  |
| Total CER                   |                | <b>47.6 ± 2.2</b> | <b>8.5 ± 10.5</b>  | Ergosterol                         | 18:3              | 3.9 ± 0.2         | 0 ± 0              |                  |  |
| IPC 48:0;3                  |                | 0.1 ± 0           | 0.1 ± 0.1          | Epi- + Feco-sterol                 | 18:3              | 0.7 ± 0.1         | 0.2 ± 0.3          |                  |  |
| IPC 48:0;4                  |                | 0 ± 0             | 0 ± 0              | Lanosterol                         | 18:3              | 0.4 ± 0           | 1 ± 0.9            |                  |  |
| IPC 50:0;3                  |                | 9.4 ± 0.2         | 19.3 ± 8.3         | Total 18:3-SE                      |                   | <b>5.6 ± 0.5</b>  | <b>1.6 ± 1.6</b>   |                  |  |
| IPC 48:0;5                  |                | 0 ± 0             | 0 ± 0              | Zymosterol                         | 18:2              | 1.4 ± 0.2         | 0.2 ± 0.3          |                  |  |
| IPC 50:0;4                  |                | 4.1 ± 2           | 10.4 ± 5.2         | Ergostatetraenol                   | 18:2              | 0.8 ± 0.3         | 0 ± 0              |                  |  |
| IPC 52:0;3                  |                | 13.9 ± 1.3        | 23 ± 1.7           | Ergosterol                         | 18:2              | 14.3 ± 0.7        | 1.8 ± 1.7          |                  |  |
| IPC 50:0;5                  |                | 0.1 ± 0           | 0 ± 0.1            | Epi- + Feco-sterol                 | 18:2              | 3.8 ± 0.4         | 0 ± 0              |                  |  |
| IPC 52:0;4                  |                | 0.9 ± 0.4         | 2.8 ± 1.5          | Lanosterol                         | 18:2              | 1.1 ± 0.4         | 5.5 ± 1.2          |                  |  |
| IPC 52:0;5                  |                | 0 ± 0             | 0.1 ± 0.1          | Total 18:2-SE                      |                   | <b>21.4 ± 1</b>   | <b>7.4 ± 0.7</b>   |                  |  |
| Total IPC                   |                | <b>28.5 ± 1.3</b> | <b>55.7 ± 14.1</b> | Zymosterol                         | 18:1              | 5 ± 1.3           | 0.6 ± 1            |                  |  |
| MIPC 54:0;3                 |                | 0.1 ± 0           | 0 ± 0              | Ergostatetraenol                   | 18:1              | 4.7 ± 0.7         | 0.7 ± 1.2          |                  |  |
| MIPC 56:0;3                 |                | 9.5 ± 1.3         | 9.8 ± 2.2          | Ergosterol                         | 18:1              | 37.1 ± 1.4        | 4 ± 4.2            |                  |  |
| MIPC 54:0;5                 |                | 0 ± 0             | 0 ± 0              | Epi- + Feco-sterol                 | 18:1              | 12.9 ± 1          | 10.3 ± 13.8        |                  |  |
| MIPC 56:0;4                 |                | 2.2 ± 0.6         | 1.9 ± 2.2          | Lanosterol                         | 18:1              | 3.9 ± 0.6         | 11.9 ± 5.5         |                  |  |
| MIPC 58:0;3                 |                | 11.1 ± 1.1        | 13.8 ± 8           | Total 18:1-SE                      |                   | <b>63.6 ± 1.1</b> | <b>27.5 ± 14.1</b> |                  |  |
| MIPC 56:0;5                 |                | 0 ± 0             | 0 ± 0              | Zymosterol                         | 18:0              | 0.3 ± 0.1         | 0.3 ± 0.5          |                  |  |
| MIPC 58:0;4                 |                | 0.5 ± 0.2         | 0.2 ± 0.3          | Ergostatetraenol                   | 18:0              | 0.3 ± 0.1         | 0 ± 0              |                  |  |
| MIPC 58:0;5                 |                | 0 ± 0             | 0 ± 0              | Ergosterol                         | 18:0              | 2.7 ± 0.4         | 0.2 ± 0.3          |                  |  |
| Total MIPC                  |                | <b>23.4 ± 2.1</b> | <b>25.7 ± 8.5</b>  | Epi- + Feco-sterol                 | 18:0              | 1 ± 0.3           | 3.7 ± 3.4          |                  |  |
| M(IP) <sub>2</sub> C 62:0;3 |                | 0.3 ± 0.2         | 4.4 ± 4.6          | Lanosterol                         | 18:0              | 0.2 ± 0.2         | 6.4 ± 7.5          |                  |  |
| M(IP) <sub>2</sub> C 62:0;4 |                | 0 ± 0             | 0.1 ± 0.2          | Total 18:0-SE                      |                   | <b>4.4 ± 0.5</b>  | <b>10.6 ± 11.1</b> |                  |  |
| M(IP) <sub>2</sub> C 64:0;3 |                | 0.3 ± 0.2         | 5.3 ± 4.6          | Total-SE                           |                   | <b>100</b>        | <b>100</b>         |                  |  |
| M(IP) <sub>2</sub> C 64:0;4 |                | 0 ± 0             | 0.4 ± 0.6          |                                    |                   |                   |                    |                  |  |
| Total M(IP) <sub>2</sub> C  |                | <b>0.6 ± 0.5</b>  | <b>10.1 ± 9.1</b>  | Lanosterol ester                   |                   | <b>6.5 ± 1.3</b>  | <b>55.1 ± 19.5</b> |                  |  |
| Total-SL                    |                | <b>100</b>        | <b>100</b>         | Zymosterol ester                   |                   | <b>6.9 ± 1.2</b>  | <b>5.3 ± 5.9</b>   |                  |  |
| Zymosterol                  | 16:1           | 0 ± 0             | 0.9 ± 1.1          | Epi- + Feco-sterol ester           |                   | <b>19.5 ± 1.2</b> | <b>32.3 ± 8.9</b>  |                  |  |
| Ergostatetraenol            | 16:1           | 0 ± 0             | 0 ± 0              | Ergostatetraenol ester             |                   | <b>6.4 ± 1.1</b>  | <b>0.7 ± 1.2</b>   |                  |  |
| Ergosterol                  | 16:1           | 1 ± 0.1           | 0 ± 0              | Ergosterol ester                   |                   | <b>60.7 ± 2.6</b> | <b>6.6 ± 6.6</b>   |                  |  |
| Epi- + Feco-sterol          | 16:1           | 0.4 ± 0.1         | 3.4 ± 4            |                                    |                   |                   |                    |                  |  |
| Lanosterol                  | 16:1           | 0.3 ± 0.1         | 3.2 ± 3.1          |                                    |                   |                   |                    |                  |  |
| Total 16:1-SE               |                | <b>1.7 ± 0.2</b>  | <b>7.5 ± 3.7</b>   | <i>STEROLS AS ANALYZED BY GCMS</i> |                   |                   |                    |                  |  |
| Zymosterol                  | 16:0           | 0.1 ± 0           | 2.9 ± 3.6          | Farnesol                           |                   | 0.4 ± 0.3         | 4.5 ± 1            |                  |  |
| Ergostatetraenol            | 16:0           | 0 ± 0             | 0 ± 0              | Squalene                           |                   | 1 ± 0.5           | 42.5 ± 19.4        |                  |  |
| Ergosterol                  | 16:0           | 1.8 ± 0.2         | 0.6 ± 1            | Lanosterol                         |                   | 1 ± 0.4           | 13.5 ± 3.3         |                  |  |
| Epi- + Feco-sterol          | 16:0           | 0.7 ± 0.3         | 14.8 ± 7.2         | Zymosterol                         |                   | 5.3 ± 4.7         | 0 ± 0              |                  |  |

1

|               |      |                  |                  |                  |             |            |
|---------------|------|------------------|------------------|------------------|-------------|------------|
| Lanosterol    | 16:0 | 0.8 ± 0.2        | 27.1 ± 23.5      | Ergostatetraenol | 18.3 ± 14.7 | 14.1 ± 16  |
| Total 16:0-SE |      | <b>3.3 ± 0.3</b> | <b>45.4 ± 26</b> | Ergosterol       | 74 ± 11.4   | 25.4 ± 5.7 |

| Lipid Species  | Fatty acyl | No CUR      | CUR         | Lipid Species  | Fatty acyl | No CUR     | CUR         |
|----------------|------------|-------------|-------------|----------------|------------|------------|-------------|
| 30:1           | 16:1       | 0 ± 0       | 0 ± 0       | 54:0           | 16:0       | 0 ± 0      | 0.2 ± 0.2   |
| 32:1           | 16:1       | 4.6 ± 2.2   | 2.2 ± 1.3   | 920?           | 16:0       | 0.1 ± 0.1  | 0 ± 0       |
| 34:4           | 16:1       | 3.1 ± 3.4   | 0 ± 0       | 56:1           | 16:0       | 0.2 ± 0    | 0.1 ± 0.1   |
| 34:3           | 16:1       | 33.3 ± 9.8  | 0 ± 0       | 56:0           | 16:0       | 0.1 ± 0    | 0.3 ± 0.3   |
| 34:2           | 16:1       | 46.1 ± 10.6 | 0.2 ± 0.1   | 948?           | 16:0       | 0.2 ± 0    | 0 ± 0       |
| 34:1           | 16:1       | 0.1 ± 0.1   | 0 ± 0       | 58:2           | 16:0       | 0.4 ± 0    | 0 ± 0       |
| 36:2           | 16:1       | 0.6 ± 0.5   | 0 ± 0       | 58:1           | 16:0       | 0.7 ± 0.1  | 0.1 ± 0.1   |
| 36:1           | 16:1       | 0 ± 0       | 0.1 ± 0.1   | 58:0           | 16:0       | 0 ± 0      | 0 ± 0       |
| 36:0           | 16:1       | 10 ± 17.4   | 89.8 ± 3.3  | 976?           | 16:0       | 0.2 ± 0    | 0 ± 0       |
| 38:7           | 16:1       | 0.5 ± 0.8   | 6.9 ± 1.7   | 60:2           | 16:0       | 0.1 ± 0    | 0 ± 0       |
| 38:6           | 16:1       | 0 ± 0.1     | 0.6 ± 0.7   | 988?           | 16:0       | 0.1 ± 0    | 0 ± 0       |
| 38:4           | 16:1       | 0.3 ± 0.3   | 0 ± 0.1     | 60:1           | 16:0       | 0.1 ± 0.1  | 0 ± 0       |
| 38:3           | 16:1       | 0.9 ± 0.6   | 0 ± 0       | Total 16:0-TAG |            | 100        | 100         |
| 40:7           | 16:1       | 0 ± 0       | 0 ± 0.1     | 40:4           | 18:3       | 0.8 ± 0.1  | 10.9 ± 9.6  |
| 40:5           | 16:1       | 0.4 ± 0.4   | 0 ± 0       | 40:3           | 18:3       | 0.2 ± 0.2  | 0 ± 0       |
| Total 16:1-DAG |            | <b>100</b>  | <b>100</b>  | L?             | 18:3       | 0.3 ± 0.2  | 0 ± 0       |
| 26:0           | 16:0       | 0 ± 0       | 0.3 ± 0.3   | M?             | 18:3       | 0.1 ± 0.1  | 0 ± 0       |
| 28:0           | 16:0       | 0 ± 0.1     | 0 ± 0.1     | 50:4           | 18:3       | 3.4 ± 0.4  | 4 ± 6.9     |
| 30:1           | 16:0       | 0 ± 0       | 0.7 ± 0.4   | 50:3           | 18:3       | 0.2 ± 0.1  | 0 ± 0       |
| 32:1           | 16:0       | 4.9 ± 1.5   | 17.1 ± 15.7 | 866?           | 18:3       | 1.6 ± 0.7  | 0 ± 0       |
| 32:0           | 16:0       | 0.3 ± 0.5   | 13.5 ± 3.4  | 52:6           | 18:3       | 12.5 ± 1.5 | 15.6 ± 17.7 |
| 34:3           | 16:0       | 2.1 ± 1.2   | 0 ± 0       | 52:5           | 18:3       | 21.3 ± 1.8 | 22.8 ± 17.9 |
| 34:2           | 16:0       | 43.8 ± 1.5  | 12.1 ± 8.9  | 52:4           | 18:3       | 12 ± 0.7   | 12.5 ± 8    |
| 34:1           | 16:0       | 46.4 ± 2.4  | 12.8 ± 6.8  | 886?           | 18:3       | 1 ± 0.6    | 0 ± 0       |
| 34:0           | 16:0       | 0.3 ± 0.3   | 8.7 ± 8.5   | 53:2           | 18:3       | 0 ± 0      | 11.3 ± 19.6 |
| 36:6           | 16:0       | 0 ± 0       | 5.5 ± 6.4   | 892?           | 18:3       | 5.9 ± 0.6  | 0.1 ± 0.2   |
| 36:3           | 16:0       | 0 ± 0       | 0 ± 0       | 898?           | 18:3       | 33.3 ± 2.5 | 18 ± 9.5    |
| 36:2           | 16:0       | 0.3 ± 0.1   | 0.1 ± 0.2   | 900?           | 18:3       | 7.4 ± 0.8  | 4.8 ± 5.9   |
| 36:1           | 16:0       | 0.3 ± 0.1   | 0.7 ± 1.1   | 54:0           | 18:3       | 0.1 ± 0    | 0 ± 0       |
| 36:0           | 16:0       | 0 ± 0       | 1.7 ± 0.9   | 914?           | 18:3       | 0 ± 0      | 0 ± 0       |
| 38:7           | 16:0       | 0.5 ± 0.6   | 11.3 ± 5.9  | Total 18:3-TAG |            | <b>100</b> | <b>100</b>  |
| 38:6           | 16:0       | 0 ± 0       | 6 ± 4.8     | 40:3           | 18:2       | 0.2 ± 0.1  | 1 ± 0.8     |
| 38:5           | 16:0       | 0 ± 0       | 0.6 ± 0.7   | 40:2           | 18:2       | 0.2 ± 0.1  | 0 ± 0       |
| 38:3           | 16:0       | 0 ± 0       | 0.3 ± 0.6   | 41:3           | 18:2       | 0 ± 0      | 0 ± 0       |
| 40:7           | 16:0       | 1 ± 0.6     | 5.6 ± 1.9   | 41:2           | 18:2       | 0.1 ± 0    | 0 ± 0.1     |
| 40:6           | 16:0       | 0 ± 0       | 1.7 ± 1.8   | 41:1           | 18:2       | 0 ± 0      | 0 ± 0       |
| 40:5           | 16:0       | 0 ± 0       | 1.2 ± 1     | D?             | 18:2       | 0 ± 0      | 0 ± 0.1     |
| Total 16:0-DAG |            | <b>100</b>  | <b>100</b>  | H?             | 18:2       | 0 ± 0      | 0 ± 0.1     |
| 34:5           | 18:3       | 0 ± 0       | 0 ± 0       | 46:3           | 18:2       | 0 ± 0      | 1.4 ± 1.6   |
| 34:4           | 18:3       | 10.1 ± 3.7  | 37.9 ± 46.3 | 46:2           | 18:2       | 0 ± 0      | 0.9 ± 0.9   |
| 34:3           | 18:3       | 2.5 ± 1.6   | 4 ± 6.9     | M?             | 18:2       | 0 ± 0      | 0.2 ± 0.3   |
| 36:6           | 18:3       | 0.3 ± 0.4   | 0 ± 0       | 48:3           | 18:2       | 0.3 ± 0.1  | 1.8 ± 0.5   |
| 36:5           | 18:3       | 32 ± 4.2    | 1.8 ± 3     | 48:2           | 18:2       | 0.2 ± 0.1  | 4.1 ± 0.7   |
| 36:4           | 18:3       | 50.6 ± 1.9  | 28.9 ± 25   | O?             | 18:2       | 0.1 ± 0.1  | 0.3 ± 0.3   |
| 36:3           | 18:3       | 0.5 ± 0.8   | 0 ± 0       | 49:2           | 18:2       | 0.1 ± 0    | 0.5 ± 0.9   |
| 38:4           | 18:3       | 3.2 ± 0.1   | 1.1 ± 2     | 50:4           | 18:2       | 3 ± 0.2    | 2.6 ± 0.6   |
| 40:7           | 18:3       | 0 ± 0       | 0 ± 0       | 50:3           | 18:2       | 4.5 ± 0.2  | 6.2 ± 2     |
| 40:6           | 18:3       | 0.2 ± 0.4   | 26.1 ± 25.8 | 50:2           | 18:2       | 1.6 ± 0.3  | 3.7 ± 1.1   |
| 40:5           | 18:3       | 0.6 ± 0.6   | 0.3 ± 0.4   | 866?           | 18:2       | 0 ± 0      | 0 ± 0       |
| Total 18:3-DAG |            | <b>100</b>  | <b>100</b>  | 52:6           | 18:2       | 2 ± 0.1    | 0.3 ± 0.4   |
| 26:0           | 18:2       | 0.2 ± 0.1   | 0 ± 0       | 52:5           | 18:2       | 8.6 ± 0.5  | 3.4 ± 1.5   |
| 34:4           | 18:2       | 0.1 ± 0     | 0.7 ± 0.7   | 52:4           | 18:2       | 16.7 ± 0.5 | 31 ± 8.1    |
| 34:3           | 18:2       | 11.8 ± 0.4  | 35.5 ± 36.9 | 52:3           | 18:2       | 11.7 ± 0.2 | 12.6 ± 3.9  |
| 34:2           | 18:2       | 23.3 ± 2.3  | 23.7 ± 11.5 | 52:2           | 18:2       | 1.2 ± 0.3  | 2 ± 1.6     |
| 36:6           | 18:2       | 0 ± 0       | 0 ± 0       | 886?           | 18:2       | 2.4 ± 0.2  | 0.4 ± 0.3   |
| 36:5           | 18:2       | 3.4 ± 0.5   | 0.5 ± 0.9   | 53:3           | 18:2       | 0.9 ± 0.1  | 0 ± 0.1     |
| 36:4           | 18:2       | 24.1 ± 1.4  | 24.9 ± 18.1 | 53:2           | 18:2       | 0.1 ± 0    | 0.1 ± 0.1   |
| 36:3           | 18:2       | 27.5 ± 1.2  | 12.6 ± 10.8 | 892?           | 18:2       | 0.3 ± 0    | 0 ± 0       |
| 36:2           | 18:2       | 5.2 ± 1.3   | 0.9 ± 1.3   | 898?           | 18:2       | 19.2 ± 0.7 | 10.6 ± 0.3  |
| 38:5           | 18:2       | 0 ± 0       | 0 ± 0       | 900?           | 18:2       | 18.5 ± 0.3 | 11.1 ± 3.2  |
| 38:4           | 18:2       | 0.1 ± 0.1   | 0 ± 0       | 54:3           | 18:2       | 6.4 ± 0.3  | 4.4 ± 1.3   |
| 38:3           | 18:2       | 3.3 ± 0.4   | 0.2 ± 0.4   | 54:2           | 18:2       | 0.1 ± 0.1  | 0.2 ± 0.2   |

|                       |      |             |             |                       |      |            |            |
|-----------------------|------|-------------|-------------|-----------------------|------|------------|------------|
| <b>40:5</b>           | 18:2 | 1 ± 0.1     | 1 ± 0.9     | <b>54:0</b>           | 18:2 | 0 ± 0      | 0 ± 0      |
| <b>Total 18:2-DAG</b> |      | <b>100</b>  | <b>100</b>  | <b>914?</b>           | 18:2 | 0.1 ± 0.1  | 0 ± 0      |
| <b>28:1</b>           | 18:1 | 0.1 ± 0.1   | 0.8 ± 0.7   | <b>916?</b>           | 18:2 | 0.2 ± 0.1  | 0 ± 0      |
| <b>30:1</b>           | 18:1 | 0 ± 0       | 2 ± 1.7     | <b>922?</b>           | 18:2 | 0 ± 0      | 0 ± 0      |
| <b>32:1</b>           | 18:1 | 0.5 ± 0.5   | 0.8 ± 1.4   | <b>928?</b>           | 18:2 | 0.2 ± 0.1  | 0.6 ± 1.1  |
| <b>32:0</b>           | 18:1 | 0 ± 0       | 7.9 ± 11.3  | <b>930?</b>           | 18:2 | 0.1 ± 0.1  | 0.1 ± 0.1  |
| <b>34:6</b>           | 18:1 | 0 ± 0       | 0.3 ± 0.6   | <b>56:2</b>           | 18:2 | 0 ± 0      | 0 ± 0      |
| <b>34:3</b>           | 18:1 | 0.2 ± 0.2   | 3.6 ± 5.4   | <b>958?</b>           | 18:2 | 0.2 ± 0.1  | 0 ± 0      |
| <b>34:2</b>           | 18:1 | 12.2 ± 0.3  | 17.9 ± 6.7  | <b>58:2</b>           | 18:2 | 0.3 ± 0    | 0.1 ± 0    |
| <b>34:1</b>           | 18:1 | 17.1 ± 1.1  | 18.9 ± 7.6  | <b>60:2</b>           | 18:2 | 0.2 ± 0.1  | 0 ± 0      |
| <b>34:0</b>           | 18:1 | 0 ± 0       | 0 ± 0       | <b>988?</b>           | 18:2 | 0.2 ± 0.1  | 0 ± 0      |
| <b>36:5</b>           | 18:1 | 0.1 ± 0.1   | 0 ± 0       | <b>Total 18:2-TAG</b> |      | <b>100</b> | <b>100</b> |
| <b>36:4</b>           | 18:1 | 5.2 ± 0.5   | 5.1 ± 4.1   | <b>40:2</b>           | 18:1 | 0.3 ± 0.1  | 0.8 ± 0.6  |
| <b>36:3</b>           | 18:1 | 20.1 ± 2.5  | 11.5 ± 0.9  | <b>40:1</b>           | 18:1 | 0.2 ± 0.1  | 0.2 ± 0.3  |
| <b>36:2</b>           | 18:1 | 37.3 ± 1.1  | 26.1 ± 3.3  | <b>41:2</b>           | 18:1 | 0 ± 0      | 0 ± 0      |
| <b>36:1</b>           | 18:1 | 7 ± 0.4     | 2 ± 0.6     | <b>41:1</b>           | 18:1 | 0 ± 0      | 0.2 ± 0.1  |
| <b>36:0</b>           | 18:1 | 0 ± 0       | 0.3 ± 0.5   | <b>41:0</b>           | 18:1 | 0 ± 0      | 0 ± 0      |
| <b>38:7</b>           | 18:1 | 0 ± 0       | 1.2 ± 2.1   | <b>42:2</b>           | 18:1 | 0 ± 0      | 0.1 ± 0.1  |
| <b>38:4</b>           | 18:1 | 0 ± 0       | 0 ± 0       | <b>C?</b>             | 18:1 | 0 ± 0      | 0 ± 0      |
| <b>38:3</b>           | 18:1 | 0.1 ± 0.2   | 0.1 ± 0.3   | <b>43:2</b>           | 18:1 | 0 ± 0      | 0.1 ± 0.1  |
| <b>40:7</b>           | 18:1 | 0 ± 0       | 0.6 ± 0.6   | <b>44:2</b>           | 18:1 | 0 ± 0      | 0.1 ± 0.1  |
| <b>40:5</b>           | 18:1 | 0 ± 0       | 0.9 ± 1.3   | <b>44:1</b>           | 18:1 | 0 ± 0      | 0.2 ± 0.2  |
| <b>Total 18:1-DAG</b> |      | <b>100</b>  | <b>100</b>  | <b>46:3</b>           | 18:1 | 0 ± 0      | 0.2 ± 0.1  |
| <b>28:0</b>           | 18:0 | 7.1 ± 3.6   | 0 ± 0       | <b>46:2</b>           | 18:1 | 0.1 ± 0    | 1 ± 0.6    |
| <b>32:1</b>           | 18:0 | 0 ± 0       | 3.1 ± 3     | <b>46:1</b>           | 18:1 | 0 ± 0      | 0.7 ± 0.3  |
| <b>32:0</b>           | 18:0 | 0.2 ± 0.2   | 3.9 ± 3.2   | <b>47:1</b>           | 18:1 | 0 ± 0      | 0.5 ± 0.6  |
| <b>34:6</b>           | 18:0 | 0.1 ± 0.1   | 0 ± 0       | <b>47:0</b>           | 18:1 | 0 ± 0      | 0.7 ± 0.2  |
| <b>34:1</b>           | 18:0 | 8.3 ± 3.1   | 6.1 ± 2.9   | <b>48:3</b>           | 18:1 | 0 ± 0      | 0.3 ± 0.1  |
| <b>34:0</b>           | 18:0 | 1 ± 0.2     | 22.5 ± 20.6 | <b>48:2</b>           | 18:1 | 0.4 ± 0    | 1.2 ± 0.2  |
| <b>36:6</b>           | 18:0 | 0 ± 0       | 0 ± 0       | <b>48:1</b>           | 18:1 | 0.3 ± 0.1  | 9.7 ± 2.6  |
| <b>36:3</b>           | 18:0 | 0.6 ± 0.4   | 0 ± 0       | <b>O?</b>             | 18:1 | 0 ± 0      | 0 ± 0      |
| <b>36:2</b>           | 18:0 | 28.5 ± 4.7  | 3.1 ± 4.1   | <b>49:2</b>           | 18:1 | 0.1 ± 0    | 0.2 ± 0.1  |
| <b>36:1</b>           | 18:0 | 53.7 ± 10.8 | 6.1 ± 6     | <b>49:1</b>           | 18:1 | 0 ± 0      | 0.5 ± 0.5  |
| <b>36:0</b>           | 18:0 | 0.2 ± 0.3   | 20.7 ± 4.9  | <b>50:4</b>           | 18:1 | 0.2 ± 0    | 0.1 ± 0.1  |
| <b>38:7</b>           | 18:0 | 0.1 ± 0.2   | 25.6 ± 26   | <b>50:3</b>           | 18:1 | 2.3 ± 0.2  | 2.8 ± 0.7  |
| <b>38:6</b>           | 18:0 | 0 ± 0       | 0.7 ± 1.2   | <b>50:2</b>           | 18:1 | 3.8 ± 0.2  | 4.8 ± 0.3  |
| <b>38:3</b>           | 18:0 | 0.1 ± 0.1   | 0 ± 0       | <b>50:1</b>           | 18:1 | 0.6 ± 0.1  | 2.1 ± 0.3  |
| <b>40:7</b>           | 18:0 | 0.1 ± 0.2   | 8.3 ± 7.7   | <b>864?</b>           | 18:1 | 0.2 ± 0    | 0.2 ± 0.1  |
| <b>Total 18:0-DAG</b> |      | <b>100</b>  | <b>100</b>  | <b>52:6</b>           | 18:1 | 0 ± 0      | 0 ± 0      |
|                       |      |             |             | <b>52:5</b>           | 18:1 | 1.1 ± 0    | 0.2 ± 0    |
| <b>44:2</b>           | 16:1 | 0 ± 0       | 0 ± 0       | <b>52:4</b>           | 18:1 | 6.5 ± 0.4  | 3.2 ± 2.2  |
| <b>46:3</b>           | 16:1 | 0.1 ± 0.2   | 31.6 ± 6.8  | <b>52:3</b>           | 18:1 | 15.4 ± 0.2 | 29.8 ± 7.1 |
| <b>46:2</b>           | 16:1 | 0 ± 0       | 10.9 ± 1.1  | <b>52:2</b>           | 18:1 | 9.5 ± 0.4  | 9.1 ± 2.6  |
| <b>46:1</b>           | 16:1 | 0 ± 0       | 4.1 ± 2.3   | <b>52:1</b>           | 18:1 | 0.9 ± 0.1  | 0.6 ± 0.2  |
| <b>47:2</b>           | 16:1 | 0 ± 0       | 9.3 ± 4.3   | <b>886?</b>           | 18:1 | 1.1 ± 0    | 0.3 ± 0.4  |
| <b>47:1</b>           | 16:1 | 0 ± 0       | 2.4 ± 1.8   | <b>53:3</b>           | 18:1 | 1.7 ± 0    | 0.6 ± 0.2  |
| <b>M?</b>             | 16:1 | 0 ± 0       | 0.1 ± 0.2   | <b>53:2</b>           | 18:1 | 0.8 ± 0.1  | 0.5 ± 0.1  |
| <b>48:3</b>           | 16:1 | 2.6 ± 0     | 1.2 ± 0.9   | <b>892?</b>           | 18:1 | 0.1 ± 0    | 0 ± 0      |
| <b>48:2</b>           | 16:1 | 3.1 ± 0.3   | 6 ± 3.7     | <b>898?</b>           | 18:1 | 7.9 ± 0.3  | 4.1 ± 1.4  |
| <b>48:1</b>           | 16:1 | 0.3 ± 0.1   | 1.9 ± 1.1   | <b>900?</b>           | 18:1 | 14 ± 0.7   | 8.4 ± 2.9  |
| <b>O?</b>             | 16:1 | 0.8 ± 0     | 0.1 ± 0.1   | <b>54:3</b>           | 18:1 | 20.9 ± 0.3 | 11.2 ± 5.8 |
| <b>49:2</b>           | 16:1 | 0.6 ± 0.1   | 2.2 ± 1.6   | <b>54:2</b>           | 18:1 | 7.1 ± 0.5  | 3.3 ± 0.9  |
| <b>50:4</b>           | 16:1 | 8.2 ± 0.5   | 1.6 ± 1.8   | <b>54:1</b>           | 18:1 | 0.3 ± 0.2  | 0.3 ± 0.3  |
| <b>50:3</b>           | 16:1 | 18.1 ± 0.9  | 5 ± 2.9     | <b>914?</b>           | 18:1 | 0.1 ± 0    | 0.2 ± 0.2  |
| <b>50:2</b>           | 16:1 | 9.7 ± 1.2   | 2.9 ± 1.5   | <b>916?</b>           | 18:1 | 0.3 ± 0    | 0.3 ± 0.3  |
| <b>50:1</b>           | 16:1 | 0.5 ± 0.1   | 0.9 ± 0.9   | <b>918?</b>           | 18:1 | 0.3 ± 0    | 0.2 ± 0.1  |
| <b>864?</b>           | 16:1 | 0 ± 0       | 4.9 ± 1.9   | <b>920?</b>           | 18:1 | 0 ± 0      | 0 ± 0      |
| <b>866?</b>           | 16:1 | 0.1 ± 0.1   | 1.9 ± 0.9   | <b>928?</b>           | 18:1 | 0.2 ± 0    | 0.1 ± 0.1  |
| <b>52:6</b>           | 16:1 | 2.1 ± 0.4   | 2.2 ± 1.4   | <b>930?</b>           | 18:1 | 0.2 ± 0    | 0.4 ± 0.5  |
| <b>52:5</b>           | 16:1 | 8.4 ± 0.3   | 0.7 ± 0.6   | <b>56:2</b>           | 18:1 | 0.2 ± 0.1  | 0.1 ± 0    |
| <b>52:4</b>           | 16:1 | 17.7 ± 0.9  | 1.9 ± 1.5   | <b>56:1</b>           | 18:1 | 0.1 ± 0    | 0 ± 0      |
| <b>52:3</b>           | 16:1 | 21.5 ± 0.4  | 2.5 ± 1.6   | <b>946?</b>           | 18:1 | 0 ± 0      | 0 ± 0      |
| <b>52:2</b>           | 16:1 | 5.6 ± 0.1   | 0.2 ± 0.3   | <b>958?</b>           | 18:1 | 0 ± 0      | 0 ± 0      |
| <b>52:1</b>           | 16:1 | 0.1 ± 0.1   | 5.4 ± 4.8   | <b>58:2</b>           | 18:1 | 0.3 ± 0    | 0.2 ± 0.2  |
| <b>886?</b>           | 16:1 | 0 ± 0       | 0 ± 0       | <b>58:1</b>           | 18:1 | 0.2 ± 0    | 0 ± 0      |
| <b>53:3</b>           | 16:1 | 0 ± 0       | 0 ± 0       | <b>976?</b>           | 18:1 | 0.1 ± 0    | 0 ± 0      |

|                       |      |            |            |                       |      |            |            |
|-----------------------|------|------------|------------|-----------------------|------|------------|------------|
| <b>58:2</b>           | 16:1 | 0.4 ± 0.2  | 0 ± 0      | <b>60:2</b>           | 18:1 | 0.7 ± 0.1  | 0.1 ± 0.1  |
| <b>Total 16:1-TAG</b> |      | <b>100</b> | <b>100</b> | <b>988?</b>           | 18:1 | 0.7 ± 0.1  | 0.1 ± 0.1  |
| <b>40:4</b>           | 16:0 | 0 ± 0      | 2.4 ± 2.6  | <b>60:1</b>           | 18:1 | 0.2 ± 0    | 0 ± 0      |
| <b>40:0</b>           | 16:0 | 0 ± 0      | 0.8 ± 0.2  | <b>Total 18:1-TAG</b> |      | <b>100</b> | <b>100</b> |
| <b>42:0</b>           | 16:0 | 0 ± 0      | 0.9 ± 0.2  | <b>40:1</b>           | 18:0 | 0 ± 0      | 0.4 ± 0.1  |
| <b>43:0</b>           | 16:0 | 0 ± 0      | 0.6 ± 0.2  | <b>40:0</b>           | 18:0 | 0 ± 0      | 0.4 ± 0.4  |
| <b>E?</b>             | 16:0 | 0 ± 0      | 1.3 ± 0.1  | <b>46:1</b>           | 18:0 | 0 ± 0      | 0.4 ± 0.4  |
| <b>44:2</b>           | 16:0 | 0 ± 0      | 0.4 ± 0.1  | <b>46:0</b>           | 18:0 | 0 ± 0      | 0.8 ± 0.3  |
| <b>44:1</b>           | 16:0 | 0 ± 0      | 1 ± 0.4    | <b>48:2</b>           | 18:0 | 0 ± 0      | 0.2 ± 0.1  |
| <b>44:0</b>           | 16:0 | 0 ± 0      | 2.5 ± 0.7  | <b>48:1</b>           | 18:0 | 0.1 ± 0.1  | 1 ± 0.7    |
| <b>45:3</b>           | 16:0 | 0 ± 0      | 6.1 ± 6.3  | <b>48:0</b>           | 18:0 | 0.1 ± 0    | 7.2 ± 3.4  |
| <b>45:2</b>           | 16:0 | 0 ± 0      | 1.9 ± 1.7  | <b>49:1</b>           | 18:0 | 0.1 ± 0    | 0.1 ± 0.1  |
| <b>45:1</b>           | 16:0 | 0 ± 0      | 0.7 ± 0.1  | <b>P?</b>             | 18:0 | 0 ± 0      | 0.5 ± 0.1  |
| <b>45:0</b>           | 16:0 | 0 ± 0      | 2.2 ± 0.2  | <b>50:3</b>           | 18:0 | 0.1 ± 0    | 0 ± 0      |
| <b>46:2</b>           | 16:0 | 0 ± 0      | 2 ± 1.2    | <b>50:2</b>           | 18:0 | 1.7 ± 0.1  | 1.1 ± 0.4  |
| <b>46:1</b>           | 16:0 | 0.2 ± 0.1  | 2.6 ± 0.3  | <b>50:1</b>           | 18:0 | 3 ± 0.2    | 5 ± 0.7    |
| <b>46:0</b>           | 16:0 | 0.1 ± 0.1  | 5.9 ± 0.3  | <b>50:0</b>           | 18:0 | 0.2 ± 0.2  | 3.9 ± 1.9  |
| <b>47:1</b>           | 16:0 | 0 ± 0      | 0.4 ± 0.5  | <b>864?</b>           | 18:0 | 0.6 ± 0.1  | 0.8 ± 0.5  |
| <b>47:0</b>           | 16:0 | 0.2 ± 0.1  | 1.2 ± 0.6  | <b>866?</b>           | 18:0 | 0.1 ± 0    | 0.4 ± 0.3  |
| <b>K?</b>             | 16:0 | 0.1 ± 0.1  | 2.7 ± 0.3  | <b>52:4</b>           | 18:0 | 0.7 ± 0    | 0 ± 0      |
| <b>48:3</b>           | 16:0 | 0.2 ± 0    | 0.3 ± 0.1  | <b>52:3</b>           | 18:0 | 5.2 ± 0.3  | 1.3 ± 0.8  |
| <b>48:2</b>           | 16:0 | 1.8 ± 0    | 2.7 ± 0.5  | <b>52:2</b>           | 18:0 | 15.6 ± 1   | 49.1 ± 7.4 |
| <b>48:1</b>           | 16:0 | 2.8 ± 0.1  | 4.9 ± 0.7  | <b>52:1</b>           | 18:0 | 10.6 ± 1.1 | 6.4 ± 0.5  |
| <b>48:0</b>           | 16:0 | 0.3 ± 0.1  | 8.1 ± 0.9  | <b>886?</b>           | 18:0 | 0.1 ± 0.1  | 0 ± 0      |
| <b>O?</b>             | 16:0 | 0.1 ± 0    | 0 ± 0      | <b>53:3</b>           | 18:0 | 0.9 ± 0    | 0 ± 0      |
| <b>49:2</b>           | 16:0 | 0.7 ± 0    | 0.6 ± 0.2  | <b>53:2</b>           | 18:0 | 1.6 ± 0.1  | 0.5 ± 0.5  |
| <b>49:1</b>           | 16:0 | 0.6 ± 0    | 1.4 ± 0.3  | <b>892?</b>           | 18:0 | 1 ± 0.3    | 2.3 ± 0.7  |
| <b>P?</b>             | 16:0 | 0.1 ± 0    | 1.4 ± 0.4  | <b>898?</b>           | 18:0 | 1.2 ± 0.2  | 0.1 ± 0.1  |
| <b>50:4</b>           | 16:0 | 0.7 ± 0    | 0.2 ± 0.3  | <b>900?</b>           | 18:0 | 6.8 ± 0.7  | 1.4 ± 0.9  |
| <b>50:3</b>           | 16:0 | 6.8 ± 0.2  | 2.2 ± 0.8  | <b>54:3</b>           | 18:0 | 13.6 ± 0.7 | 5.4 ± 1.6  |
| <b>50:2</b>           | 16:0 | 14.5 ± 0.5 | 7.2 ± 3    | <b>54:2</b>           | 18:0 | 24 ± 0.8   | 7.2 ± 3.5  |
| <b>50:1</b>           | 16:0 | 9.2 ± 0.6  | 8.3 ± 1.6  | <b>54:1</b>           | 18:0 | 9.5 ± 1.5  | 2.3 ± 1.2  |
| <b>50:0</b>           | 16:0 | 0.1 ± 0    | 4 ± 1.4    | <b>54:0</b>           | 18:0 | 0 ± 0.1    | 1.3 ± 0.1  |
| <b>864?</b>           | 16:0 | 0.9 ± 0.1  | 0.7 ± 0.3  | <b>914?</b>           | 18:0 | 0 ± 0      | 0 ± 0      |
| <b>866?</b>           | 16:0 | 0 ± 0      | 0.6 ± 0.4  | <b>916?</b>           | 18:0 | 0.1 ± 0    | 0.1 ± 0.1  |
| <b>52:6</b>           | 16:0 | 0 ± 0      | 0 ± 0      | <b>918?</b>           | 18:0 | 0.1 ± 0    | 0.1 ± 0.1  |
| <b>52:5</b>           | 16:0 | 1.4 ± 0.3  | 0.2 ± 0.2  | <b>920?</b>           | 18:0 | 0.2 ± 0    | 0 ± 0      |
| <b>52:4</b>           | 16:0 | 9 ± 1      | 3.7 ± 2.2  | <b>930?</b>           | 18:0 | 0.1 ± 0    | 0 ± 0.1    |
| <b>52:3</b>           | 16:0 | 20.3 ± 1   | 7.5 ± 4.7  | <b>56:2</b>           | 18:0 | 0.2 ± 0.1  | 0 ± 0      |
| <b>52:2</b>           | 16:0 | 19.7 ± 0.8 | 6.1 ± 2.8  | <b>56:1</b>           | 18:0 | 0.2 ± 0.1  | 0 ± 0      |
| <b>52:1</b>           | 16:0 | 7.1 ± 0.7  | 2.8 ± 0.6  | <b>56:0</b>           | 18:0 | 0 ± 0      | 0 ± 0      |
| <b>886?</b>           | 16:0 | 0 ± 0      | 0 ± 0      | <b>58:1</b>           | 18:0 | 0.4 ± 0.1  | 0.1 ± 0.1  |
| <b>53:3</b>           | 16:0 | 0.1 ± 0.1  | 0 ± 0      | <b>58:0</b>           | 18:0 | 0.1 ± 0    | 0.1 ± 0.2  |
| <b>53:2</b>           | 16:0 | 0.1 ± 0    | 0.1 ± 0.1  | <b>976?</b>           | 18:0 | 0.1 ± 0    | 0 ± 0      |
| <b>892?</b>           | 16:0 | 0.2 ± 0.1  | 0.3 ± 0.5  | <b>60:2</b>           | 18:0 | 0.3 ± 0.1  | 0 ± 0      |
| <b>900?</b>           | 16:0 | 0 ± 0      | 0 ± 0      | <b>988?</b>           | 18:0 | 0.3 ± 0.1  | 0 ± 0      |
| <b>54:3</b>           | 16:0 | 0.1 ± 0.1  | 0.1 ± 0.2  | <b>60:1</b>           | 18:0 | 1.2 ± 0.2  | 0.2 ± 0.2  |
| <b>54:2</b>           | 16:0 | 0.2 ± 0    | 0.3 ± 0.3  | <b>60:0</b>           | 18:0 | 0 ± 0      | 0 ± 0      |
| <b>54:1</b>           | 16:0 | 0.2 ± 0    | 0.1 ± 0    | <b>Total 18:0-TAG</b> |      | <b>100</b> | <b>100</b> |

1

2

3

4

5

6
